1 **The increasing trend of Non-Communicable Diseases among young adults may**  
2 **invite multiple public health challenges in the future.**

3

4 Ashis Biswas<sup>1,3</sup>, Sharmistha Roy<sup>2,3</sup>

5

6 <sup>1</sup> Public Health Research Institute, Department of Medicine, New Jersey Medical  
7 School, Rutgers University, Newark, 07103, USA

8 <sup>2</sup> Association of State Public Health Nutritionists (ASPHN), Tucson, Arizona 85740-7094

9 <sup>3</sup> Correspondent author

10

11 **Keywords:** Mortality, Communicable, Non-communicable, Disease, Global.

12 **The running head-**Comparative Study of Death Rates from Communicable and Non-  
13 Communicable Diseases

14

15 **Abstract:**

16

17 **Objective:** To compare the burden of communicable and non-communicable diseases  
18 (NCDs) in the USA and globally, particularly among 15-45 years old.

19

20 **Methods:** The imported data from the WHO Mortality Database portal was analyzed by  
21 SPSS.

22 **Results:** The study shows the percentage of death from NCDs out of total death in the  
23 USA in 2010 and 2019 were 86.7% and 86.8% which are higher than global rates of  
24 78.1% and 80.2%. Despite a similar death percentage out of total death, the death rate  
25 due to NCDs increased from 601.04/100,000 (**2010**) to 687.99/100,000 (**2019**) and  
26 790.29/100,000 (**2020**) globally; and from 693.60/100,000 (**2010**) to 753.35/100000  
27 (2019) and 795.78/100000 (2020) in the USA. On the other hand, the death rate from  
28 communicable diseases were 56.57/100000, 55.52/100000, and 129.47/100000  
29 globally; and 44.63/100000, 43.20/100000, and 151.99/100000 in the USA in the  
30 respective years. Young adults of 15-45 years show a higher NCD death rate in the  
31 USA with an increasing trend.

32

33 **Conclusion:** The USA has a higher NCDs dependent mortality rate relative to the  
34 global mortality rate, particularly among the 15-45 years age group. During the COVID-  
35 19 pandemic, the relative raising in the communicable disease death rate indicates an  
36 interplay between communicable and NCDs.

37

38 **Introduction:**

39 Death is a natural destination of any living creature including humans. People are trying  
40 to ensure a happy and healthy life journey with an increased life span. This aim derived  
41 human civilization towards industrialization and this changed people's lifestyles, food  
42 habits, and healthcare. At this point, it seems the transformation is appearing as  
43 suicidal. Once the fight was against pathogenic diseases. Now we are mainly fighting  
44 against the diseases developing inside our bodies.

45 Communicable and non-communicable diseases (NCDs) are two major categories of  
46 health conditions that affect people worldwide (1). The burden of the disease varies  
47 greatly across the globe, with some regions experiencing high rates of communicable  
48 diseases while others face rising rates of non-communicable diseases (2,3). The USA is  
49 no exception to this trend, and understanding the patterns and trends in disease-related  
50 mortality is crucial for improving public health policy and practice (4). This study aimed  
51 to compare death rates from communicable and NCDs in the USA to a cumulative  
52 global figure using data collected from the World Health Organization (WHO) over the  
53 last couple of decades. All races, sex, and age groups were included in the analysis to  
54 ensure a comprehensive view of the issue.

55 Communicable diseases, such as malaria, tuberculosis, and HIV/AIDS, have long been  
56 a major global health concern, particularly in low- and middle-income countries (1).  
57 According to the World Health Organization (WHO), communicable diseases are  
58 responsible for over 9 million deaths annually, with pneumonia, tuberculosis, and  
59 diarrheal diseases being among the most common causes of mortality (5).

60 Noncommunicable diseases (NCDs), such as heart disease, cancer, and diabetes, are  
61 now the leading cause of death worldwide, and in many countries, they have surpassed  
62 communicable diseases as the primary cause of mortality (3). According to the CDC,  
63 non-communicable diseases are responsible for over 7 out of every 10 deaths in the  
64 United States, with heart disease and cancer being the leading causes of mortality (6).  
65 Globally, NCDs are responsible for over 70% of deaths and are a significant contributor  
66 to the burden of disease in low- and middle-income countries (4). According to the  
67 WHO, non-communicable diseases are projected to account for over 75% of all deaths

68 globally by 2030 (5). However, the picture is more complex in the USA, where both  
69 communicable and NCDs are major public health concerns (4).

70 Some key factors have been found to contribute to death rates from communicable and  
71 non-communicable diseases in the USA and globally over the last ten years. Lower  
72 socioeconomic status has been associated with higher death rates from both  
73 communicable and non-communicable diseases, likely due to factors such as limited  
74 access to healthcare, unhealthy living conditions, and greater exposure to infectious  
75 agents(4). Certain lifestyle factors, such as poor diet, physical inactivity, smoking, and  
76 excessive alcohol consumption, have been linked to higher death rates from non-  
77 communicable diseases, such as cardiovascular disease and cancer (7). Exposure to  
78 environmental hazards, such as air pollution, can contribute to higher death rates from  
79 both communicable and non-communicable diseases (8,9). In addition, as the global  
80 population ages, the burden of non-communicable diseases is expected to increase,  
81 leading to higher death rates (10). Limited access to healthcare, including preventative  
82 services and treatments, can contribute to higher death rates from both communicable  
83 and non-communicable diseases (10–13).

84 Understanding the patterns and trends in death rates from communicable and NCDs is  
85 important for public health officials, policymakers, and researchers (14,15). This study  
86 will provide a comparative analysis of mortality rates from these diseases in the USA  
87 and other countries, using data from the World Health Organization. By including all  
88 races, sex, and age groups in the analysis, this study aims to shed light on differences  
89 and similarities in the burden of disease across populations. Ultimately, the findings of

90 this study could inform public health policies and interventions aimed at reducing  
91 mortality rates from communicable and non-communicable diseases.

92

### 93 **Methodology:**

94 We collected the data from the mortality database of the World Health Organization  
95 (WHO) and we used SPSS to analyze the data and to create statistical figures. We use  
96 the mortality database for both Non-Communicable Diseases (NCD) and  
97 Communicable Diseases for comparative studies between the Global and the USA.

98

### 99 **Result:**

100

101 Non-communicable diseases contribute to most global death and are increasing over  
102 time while the emergence of COVID-19 has increased the contribution to the  
103 percentage of death specific to communicable out of total death more than two times  
104 globally including in the USA. To analyze the global disease burden along with the USA,  
105 we have used a mortality database of non-communicable diseases and a mortality  
106 database of communicable diseases from the World Health Organization's mortality  
107 database portal.

108

109 The global burden of Non-Communicable Diseases (NCD) contributes most to the total  
110 burden of global health and it is in an increasing pattern in the last few decades. In

111 figure1 we showed the comparison of the Contribution of Percentage of NCD and  
112 communicable diseases out of total deaths between Global and the USA. NCD  
113 contributed to more than 76% of global death between the years 2000 to 2019 whereas  
114 the contribution of communicable diseases varied between 6-10% except for COVID-19  
115 emergence in 2020 where the percentage was above 13% and NCD contribution  
116 dropped to around 76.4%. In the USA the contribution of NCD to the total death was  
117 more than 85% between the years 2000 to 2019 with an increasing percentage and the  
118 communicable diseases percentage going down from 6.13% to around 5%. In the year  
119 2020, due to COVID-19 the communicable diseases contribution raised to 14.9% and  
120 the NCD contribution dropped to 77.8%.

121 The USA has a higher death rate from NCD most of the global death is due to NCD.  
122 Despite the reduction in percentage contribution to the total death by NCD, the death  
123 rate has increased during COVID-19 in 2020 compared to 2019, both globally and  
124 locally in the USA. The death rate is higher in the USA during and before the COVID-19  
125 emergence.

126 In figure 2A, despite the decrease in the percentage of contribution of total death by  
127 NCD, in 2010 the death rate from NCD was 601.04 per 100,000 which increased to  
128 687.99 per 100,000 in 2019 and in 2020 during the COVID-19 pandemic, it reached  
129 790.29 per 100,000. On the other hand, in the USA, the death rate in 2010 was 693.60  
130 per 100,000 and went up to 753.35 per 100,00 in 2019, and COVID-19 triggered up to  
131 795.78 per 100,00 in 2020. Figure 2B, shows the death rate due to communicable  
132 diseases under the same settings as figure 2A. The death rate from communicable  
133 diseases was 56.57 per 100,000, 55.52 per 100,000, and 129.47 per 100000 globally

134 and 44.63 per 100,000, 43.20 per 100,000; and 151.99 per 100,000 in the USA  
135 respectively.

136

137 The mortality rate (per 100,000) due to NCD among the age groups from 15-44 years in  
138 Figure 3A shows a comparison between globally and in the USA in the year 2010, 2019,  
139 and 2020. From the year 2010, the death rate due to NCD is increasing continuously in  
140 the USA among these age groups while globally the rate is consistent.

141 Figure 3B shows a comparison of the death rate (per 100,000) due to communicable  
142 diseases among the selected age groups between 15-44 years was higher globally in  
143 2010 and was improving until COVID-19 hits in 2020. In the USA the death rate was  
144 lower and went further down in 2019. In 2020, during the COVID-19 pandemic, the  
145 death rate globally and in the USA steeply increase and became almost equal among  
146 the selected age groups.

#### 147 **Discussion:**

148 To the Global burden of disease (GBD), non-communicable diseases (NCD) contribute  
149 the most irrespective of developed, developing, or under-developed countries, and the  
150 contribution of Communicable diseases next. In our analysis, we showed the  
151 comparison between the global and the USA burden of disease to show how  
152 development may impact on contribution to the burden of diseases. The USA features a  
153 mini world by providing a home to the most multicultural communities and possessing  
154 most ethnic groups. Thus, the statistics of the disease burden of the USA may feature  
155 as a global miniature of a developed state.

156 Analysis of figure 1 indicates that more than 75% of the global disease burden comes  
157 from non-communicable diseases (NCD) and in the USA the percentage is higher.  
158 During the COVID-19 pandemic in 2020, the percentage of contribution to total death  
159 decreased globally, and in the USA does not mean that the total death or death rate due  
160 to these conditions was less. In fact, both globally and in the USA the death rate due to  
161 NCD went up compared to the previous year (figure 2A). The percentage of death out of  
162 total death due to communicable diseases increased during COVID-19 in 2020 globally  
163 and in the USA also reflected in the death rate compared in figure 2B. These results,  
164 especially for the USA, reflect a synergistic impact of communicable and NCDs on each  
165 other leading to a higher rate of death.

166 Non-communicable diseases require a long period for a phenotype and these diseases  
167 are mostly observed among the old age population suggesting the underline reason for  
168 the higher death rate from NCD among old ages. But the alarming result is that in the  
169 USA, the death rate from NCD is getting higher in the young-age population in a  
170 continuous manner in the past decade (figure 3A). These age groups of the population  
171 are more important to address as this age is the center of the human life cycle. First,  
172 global development depends on these groups of the population. Second, both children  
173 and elder citizens in a family depend on this group of family members. Third and the  
174 most important is that these age groups of the population are the parents of the  
175 progeny. There is a high chance of having NCD among the progeny from the parents  
176 with NCDs. From the comparison of NCD-dependent global death rates of this age  
177 group was similar to the death rates in the USA in 2010 and science then the rate was  
178 increasing in the USA (figure 3A). On the other hand, the rate was similar or in some



179 cases down in 2019 globally. Most importantly, in 2020, the difference is more visible,  
180 as NCD dependent death rate went in the USA whereas the global death rate was  
181 relatively consistent with the previous year or even went down in some cases. This  
182 result suggests that in the developed country the lifestyle has changed, and people are  
183 physically less active and largely depend on processed food. In long run, these habits  
184 may develop NCD. Also, the environment is another important factor in developing  
185 NCDs as it is changing rapidly. On the other hand, most of the global portion consists of  
186 3<sup>rd</sup> world countries and people support their life with physical work and also have limited  
187 opportunities to afford processed food which may contribute to the lower rate of NCD.

188 Regarding communicable diseases, the population of the USA is less affected than the  
189 global population in 2010 and success in reducing it is observed in 2019 globally and in  
190 the USA. This success may be the result of the development of the healthcare system  
191 and pharmaceutical industry and drug discovery especially antibiotics, particularly for  
192 third world countries where the majority of the population lives in an unhygienic  
193 environment. However, in the very next year 2020, both the global and the US  
194 populations are drastically affected by communicable diseases, particularly COVID-19.

195 In figure 3B, the age group we indicated should have literally less impact by any  
196 pathogenic as they are supposed to have a mature and effective immune system to  
197 fight against it. A relatively higher effect of COVID-19 in this age group, particularly in  
198 the USA where non-communicable health disparities are higher is indicative to  
199 compromise immunity due to later one.

200 In old age, middle age was considered the golden time because of physical fitness, but  
201 emerging industrialization has changed that philosophy as a high percentage of the

202 population from this age group is developing NCD at an alarmingly increasing rate. At  
203 present most of the global burden of disease is NCDs and imposing a huge health care  
204 burden as there is no cure for them. If NCDs continue to increase in this age group, in  
205 the new generation will be born with a high risk of developing NCDs and compromise  
206 immunity. It is high time to educate young adults about NDC, how it develops and what  
207 are the possible consequences. Multiple public health interventions need to device and  
208 implement targeting this age group as they are the center for aspects of the community,  
209 society, and country. At the same time, they are functioning as parents, children, and  
210 decision-makers.

## 211 **Conclusion**

212 The major share of the disease burden goes to non-communicable diseases along with  
213 the healthcare burden in both global and local scenarios. The analysis finding indicates  
214 a higher death rate by non-communicable diseases in the USA while a higher global  
215 death rate by a communicable diseases. The study paid more importance to the middle  
216 age group for socioeconomic and generational vitality. It highlights the need for  
217 continued efforts to address the burden of non-communicable diseases irrespective of  
218 the economic status of a country and through developing a multi-level intervention.  
219 More importantly, the higher authorities in the world should come together to remodel  
220 the global health system to ensure health equity for all levels of people because  
221 diseases are also now globalized in this time of globalization and COVID-19 has set an  
222 example.

223

224 Implications for public health policy and practice:

225 The study has important implications for public health policy and practice. The findings  
226 suggest that efforts to prevent and treat non-communicable diseases should be a top  
227 priority for public health policymakers and practitioners. This may require a multi-faceted  
228 approach that includes policies and programs aimed at promoting healthy lifestyle  
229 habits, improving access to healthcare, and reducing environmental hazards.  
230 Additionally, the study highlights the need to address the global variation in disease  
231 burden, particularly in low- and middle-income countries where the burden of  
232 communicable diseases remains high.

233

234

235

236

237

238

239

240

241

242

243

244

245

246

247

248

249

250

251 **References:**

- 252 1. MDB [Internet]. [cited 2023 Feb 27]. Available from: <https://platform.who.int/mortality>
- 253 2. Noncommunicable diseases [Internet]. [cited 2023 Feb 27]. Available from:  
254 [https://www.who.int/health-topics/noncommunicable-diseases#tab=tab\\_1](https://www.who.int/health-topics/noncommunicable-diseases#tab=tab_1)
- 255 3. Noncommunicable diseases [Internet]. [cited 2023 Feb 27]. Available from:  
256 [https://www.who.int/health-topics/noncommunicable-diseases#tab=tab\\_1](https://www.who.int/health-topics/noncommunicable-diseases#tab=tab_1)
- 257 4. Bennett JE, Stevens GA, Mathers CD, Bonita R, Rehm J, Kruk ME, et al. NCD  
258 Countdown 2030: worldwide trends in non-communicable disease mortality and progress  
259 towards Sustainable Development Goal target 3.4. *The Lancet* [Internet]. 2018 Sep 22  
260 [cited 2023 Feb 27];392(10152):1072–88. Available from:  
261 <http://www.thelancet.com/article/S0140673618319925/fulltext>
- 262 5. Mortality and global health estimates [Internet]. [cited 2023 Feb 27]. Available from:  
263 <https://www.who.int/data/gho/data/themes/mortality-and-global-health-estimates>
- 264 6. CDC - NCHS - National Center for Health Statistics [Internet]. [cited 2023 Feb 27].  
265 Available from: <https://www.cdc.gov/nchs/index.htm>
- 266 7. GLOBAL STATUS REPORT on noncommunicable diseases 2014 “Attaining the nine  
267 global noncommunicable diseases targets; a shared responsibility.”
- 268 8. Campbell-Lendrum D, Prüss-Ustün A. Climate change, air pollution and  
269 noncommunicable diseases. *Bull World Health Organ* [Internet]. 2019 Feb 2 [cited 2023  
270 Feb 27];97(2):160. Available from: [/pmc/articles/PMC6357572/](https://pubmed.ncbi.nlm.nih.gov/30811111/)
- 271 9. Semenza JC, Rocklöv J, Ebi KL. Climate Change and Cascading Risks from Infectious  
272 Disease. *Infectious Diseases and Therapy* 2022 11:4 [Internet]. 2022 May 19 [cited 2023  
273 Feb 27];11(4):1371–90. Available from: [https://link.springer.com/article/10.1007/s40121-](https://link.springer.com/article/10.1007/s40121-022-00647-3)  
274 [022-00647-3](https://link.springer.com/article/10.1007/s40121-022-00647-3)
- 275 10. di Cesare M, Khang YH, Asaria P, Blakely T, Cowan MJ, Farzadfar F, et al. Inequalities in  
276 non-communicable diseases and effective responses. *The Lancet* [Internet]. 2013 Feb 16  
277 [cited 2023 Feb 27];381(9866):585–97. Available from:  
278 <http://www.thelancet.com/article/S0140673612618510/fulltext>

- 279 11. Global Health Estimates [Internet]. [cited 2023 Feb 27]. Available from:  
280 <https://www.who.int/data/global-health-estimates>
- 281 12. Gibbons CL, Mangen MJJ, Plass D, Havelaar AH, Brooke RJ, Kramarz P, et al.  
282 Measuring underreporting and under-ascertainment in infectious disease datasets: A  
283 comparison of methods. BMC Public Health [Internet]. 2014 Feb 11 [cited 2023 Feb  
284 27];14(1):1–17. Available from:  
285 <https://bmcpublichealth.biomedcentral.com/articles/10.1186/1471-2458-14-147>
- 286 13. CDC - NCHS - National Center for Health Statistics [Internet]. [cited 2023 Feb 27].  
287 Available from: <https://www.cdc.gov/nchs/index.htm>
- 288 14. Oshakbayev K, Zhankalova Z, Gazaliyeva M, Mustafin K, Bedelbayeva G, Dukenbayeva  
289 B, et al. Association between COVID-19 morbidity, mortality, and gross domestic product,  
290 overweight/ obesity, non-communicable diseases, vaccination rate: A cross-sectional  
291 study. J Infect Public Health [Internet]. 2022 Feb 1 [cited 2023 Feb 27];15(2):255.  
292 Available from: </pmc/articles/PMC8759097/>
- 293 15. Liu Q, Jing W, Liu M, Liu J. Health disparity and mortality trends of infectious diseases in  
294 BRICS from 1990 to 2019. J Glob Health [Internet]. 2022 [cited 2023 Feb 27];12:4028.  
295 Available from: </pmc/articles/PMC8943566/>
- 296

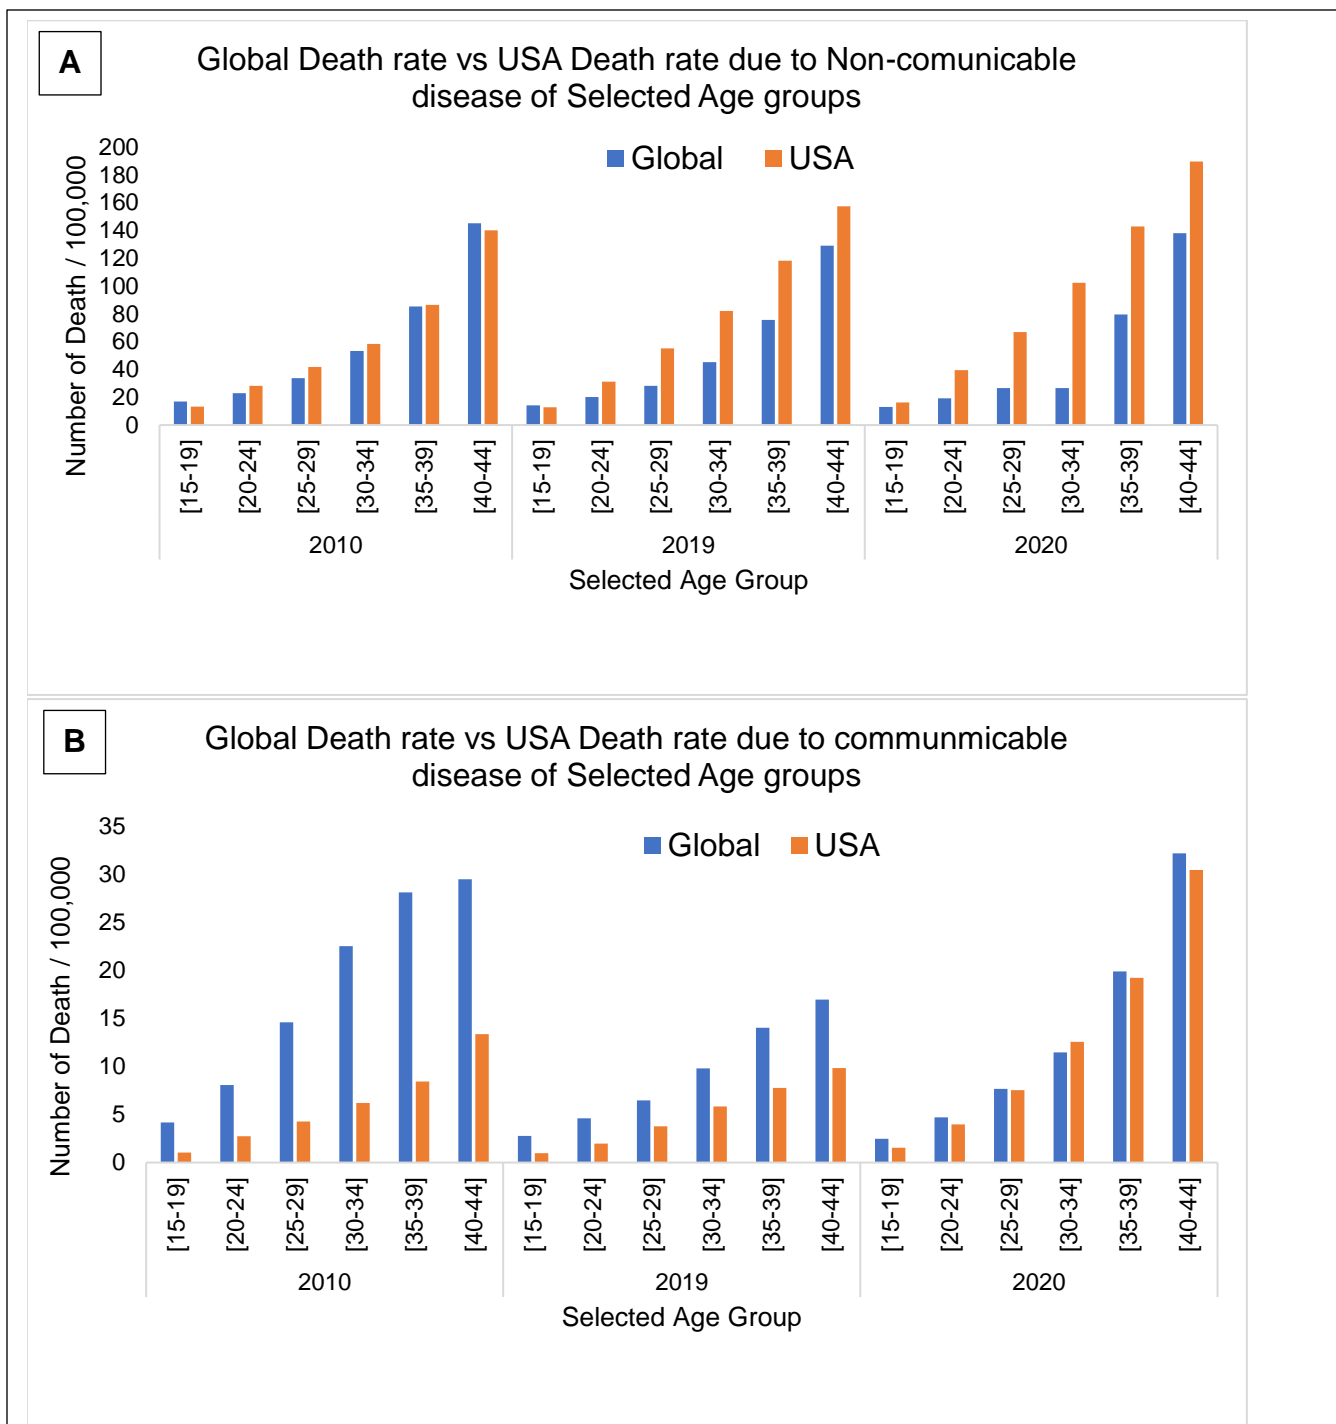

Figure 3: **A.** A comparison between the global death rate and the USA death rate from non-communicable diseases of selected age groups. The death rate increased in most of the listed age groups in 2019 & 2020 compared to 2010 in the USA while globally the death rate is stable. **B.** A comparison between the global death rate and the USA death rate from communicable diseases of selected age groups.

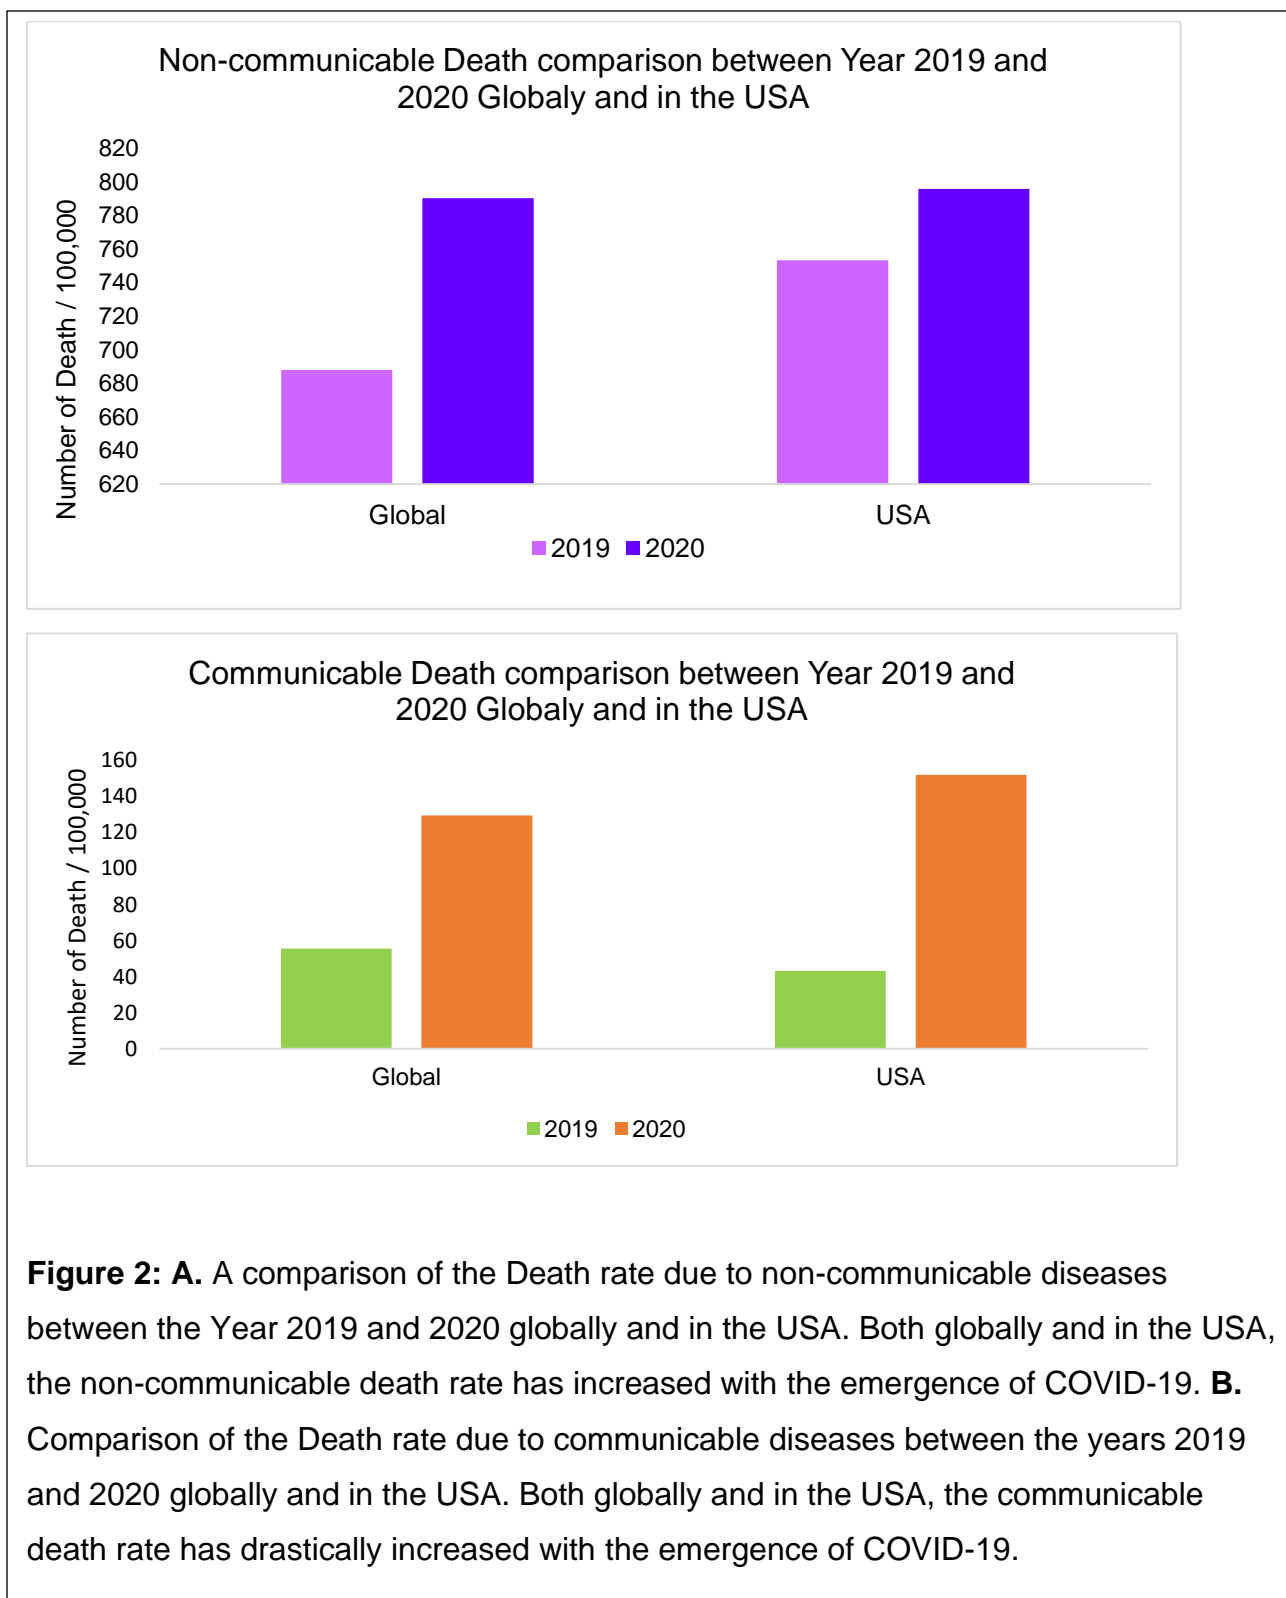

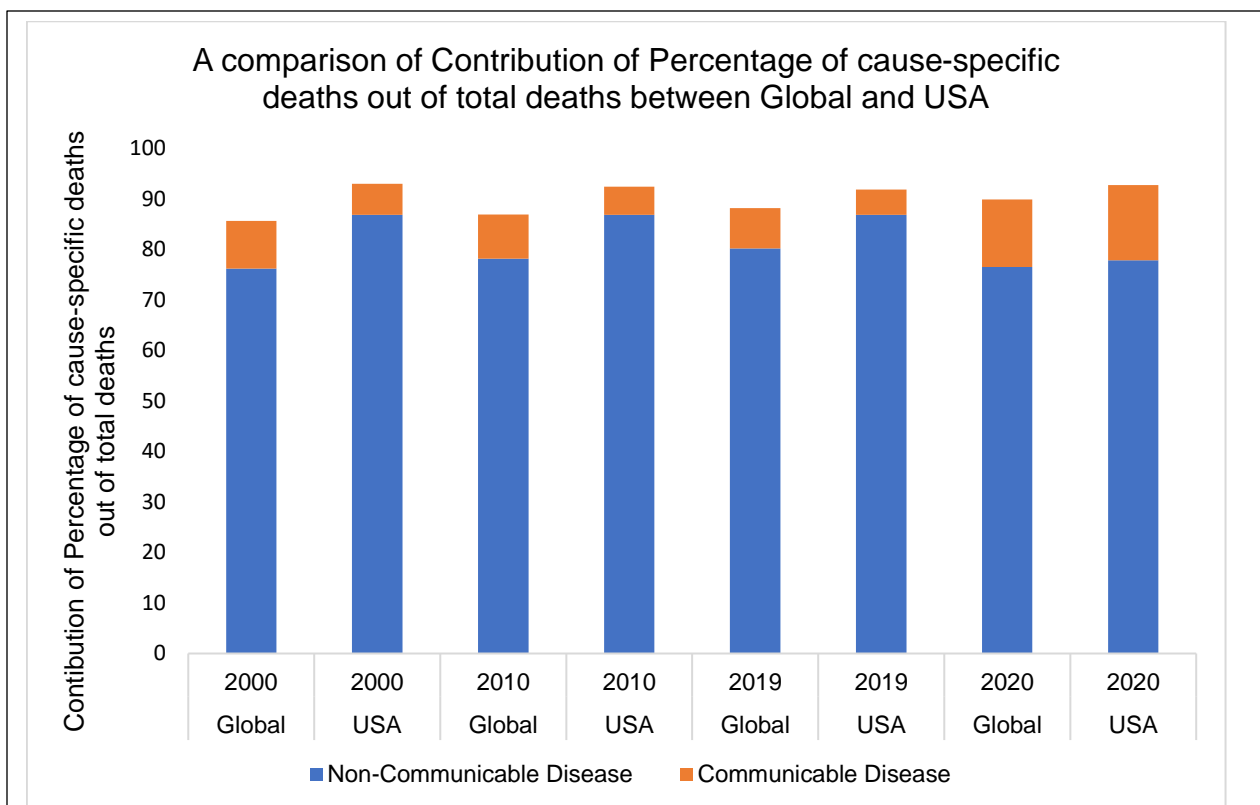

**Figure 1:** A comparison of the Contribution of Percentage of cause-specific deaths out of total deaths between Global and the USA. Non-communicable diseases contribute to the most death both globally and in the USA and the percentage is increasing. In the year 2020 the percentage of communicable disease increases both globally and in the USA which reflects the emergence of COVID-19.
